2. The importance of extensive and adequate topical anesthesia of pharynx, glottis and upper trachea is stressed and the method of accomplishing it is described.

3. A series of 80 cases not studied completely has been followed with regard to major complications.

4. The method has given satisfaction and will be continued.

#### REFERENCES

1. Burstein, C. L., and Rovenstine, E. A.: Respiratory Parasympathetic Action of Some Shorter Acting Barbituric Acid Derivatives, *J. Pharmacol. & Exper. Therap.* 68: 42-50 (May) 1938.
2. Adriani, John, and Rovenstine, E. A.: The Effect of Anesthetic Drugs upon Bronchi and Bronchioles of Excised Lung Tissue, *Anesthesiology* 4: 253-262 (May) 1943.
3. Rose, Anthony J.: Sodium Pentothal: Actual Experience in the Combat Zone, *Anesthesiology* 4: 534-539 (Sept.) 1943.
4. Lundy, J. S.: A Technical Description of the Intravenous Administration of Pentothal Sodium based on Experience in More than 12,500 Administrations. Paper read before Ohio Society of Anesthetists, May 4, 1939.
5. Adams, R. C., and Lundy, J. S.: Intravenous Anesthesia: Its Increased Possibilities when Combined with Various Other Methods of Anesthesia, *Southwest. Med.* 25: 8-10 (Jan.) 1941.
6. Ruth, H. S.; Tovell, R. M.; Milligan, A. D., and Charleroy, D. K.: Pentothal Sodium; is its Growing Popularity Justified? *J.A.M.A.* 113: 1864-1868 (Nov. 18) 1939.
7. Cooper, M. P.: The Use of Pentothal Sodium Intravenously for Anesthesia in Laryngoscopy, Bronchoscopy and Esophagoscopy, *Anesth. & Analg.* 18: 181-185 (July-Aug.) 1939.
8. Young, Gavin, and Pinkerton, H. H.: Pentothal Sodium Anesthesia in Per-oral Endoscopy, *J. Laryng. & Otol.* 56: 337-346 (Oct.) 1941.
9. Thomas, G. J.: Pentothal Sodium in Ear, Nose and Throat Surgery, *Ann. Otol., Rhin. & Laryng.* 52: 35-44 (March) 1943.
10. Long, C. H., and Ochsner, Alton: Intravenous Pentothal Sodium Anesthesia; A Review of the Literature, *Surgery* 11: 474-495 (Mar.) 1942.

#### MEETING OF THE AMERICAN SOCIETY OF ANESTHETISTS, INC.

NEW YORK ACADEMY OF MEDICINE

Fifth Avenue and 103rd Street, New York City

THURSDAY, FEBRUARY 8, 1945—8:15 P.M.

"The Use of Spinal Anesthesia to Control Sympathetic Overactivity in Hyperthyroidism."

By Ralph T. Knight, M.D., University of Minnesota, Minneapolis.

"Continuous Drip Spinal Anesthesia."

By Julia Arrowood, M.D., Massachusetts General Hospital, Boston.

Discussants for these papers will be announced in the February News Letter of the Society.
